# Supplementary material for: Vitamin B Mitigates Thoracic Aortic Dilation in Marfan Syndrome Mice by Restoring the Canonical TGF-β Pathway
Source: MDPI journal article supplement (doi:10.3390/ijms222111737), 2021-10-29
Supplement: s1 [file s1]

# Supplemental Figure S1

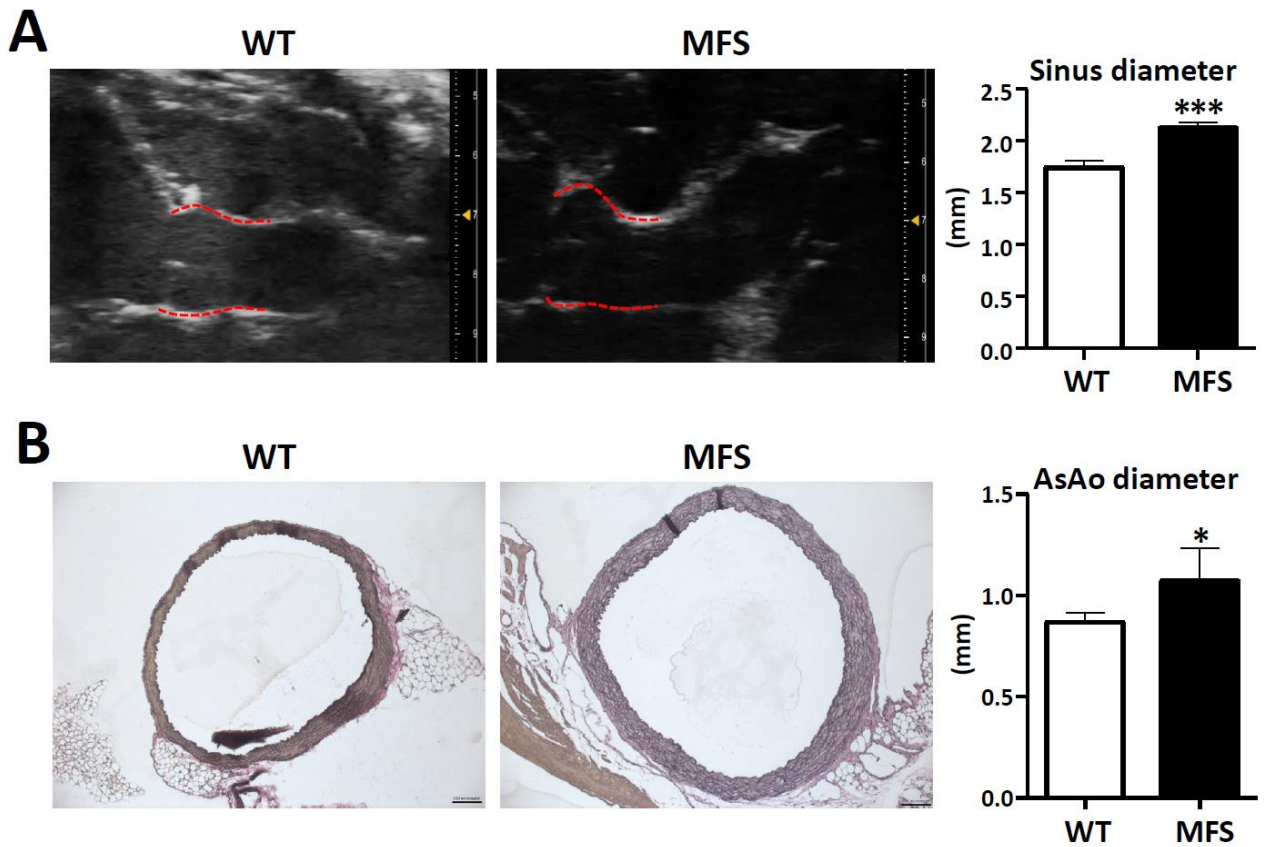

**Supplemental Figure S1. Thoracic aortic aneurysm of Marfan syndrome mouse model at the age of 6 months. (A)** Representative aortic root echocardiograph (parasternal long-axis view) and quantification of Sinus diameter (WT, n=3; MFS, n=4). **(B)** Representative Verhoeff-Van Gieson stain of ascending aorta (AsAo) and quantification of AsAo diameter (n=6 per group). Scale bar, 100 $\mu$ m. Data are presented as Mean  $\pm$  SD. \* $p$ <0.05, \*\*\* $p$ <0.001.

# Supplemental Figure S2

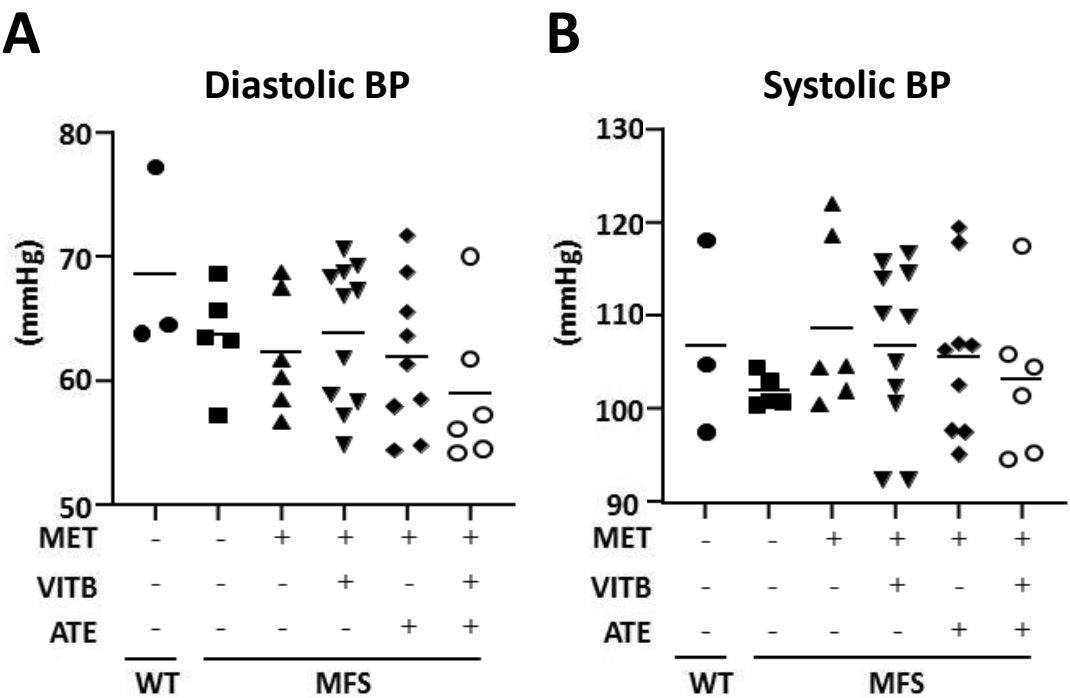

**Supplemental Figure S2. The effect of methionine and VITB treatment on blood pressure. (A)** Diastolic blood pressure. **(B)** Systolic blood pressure. No significant difference was found in blood pressure between treatment groups. WT, wild-type; C1039G/+, Marfan syndrome mouse model; MET, methionine in drinking water; VITB, vitamin B complex treatment; ATE, Atenolol treatment.
